# Supplementary material
Source: Springer Nature journal article supplement (https://www.springermedizin.de/resource/supplementary/13020_2013_201_MOESM5_ESM.pdf/9641246)

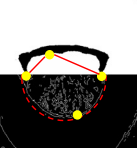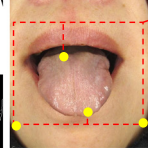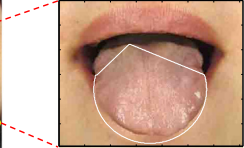

|        |         |         |         |        |
|--------|---------|---------|---------|--------|
| $\rho$ | $\rho$  | $\rho$  | $\rho$  | $\rho$ |
| $\rho$ | $\rho$  | $\rho$  | $\rho$  | $\rho$ |
| $\rho$ | $-\rho$ | $-\rho$ | $-\rho$ | $\rho$ |
| $\rho$ | $\rho$  | $-\rho$ | $\rho$  | $\rho$ |

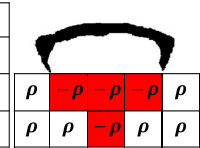

Supplement: MOESM5 [file 9641246]
